# Supplementary material for: Projected Impacts of Climate and Land-Use Change on the Global Diversity of Birds
Source: PLOS journal article supplement (doi:10.1371/journal.pbio.0050157), 2007-06-01
Supplement: S3 (10.1371/journal.pbio.0050157.s003) [file journal.pbio.0050157.s003]

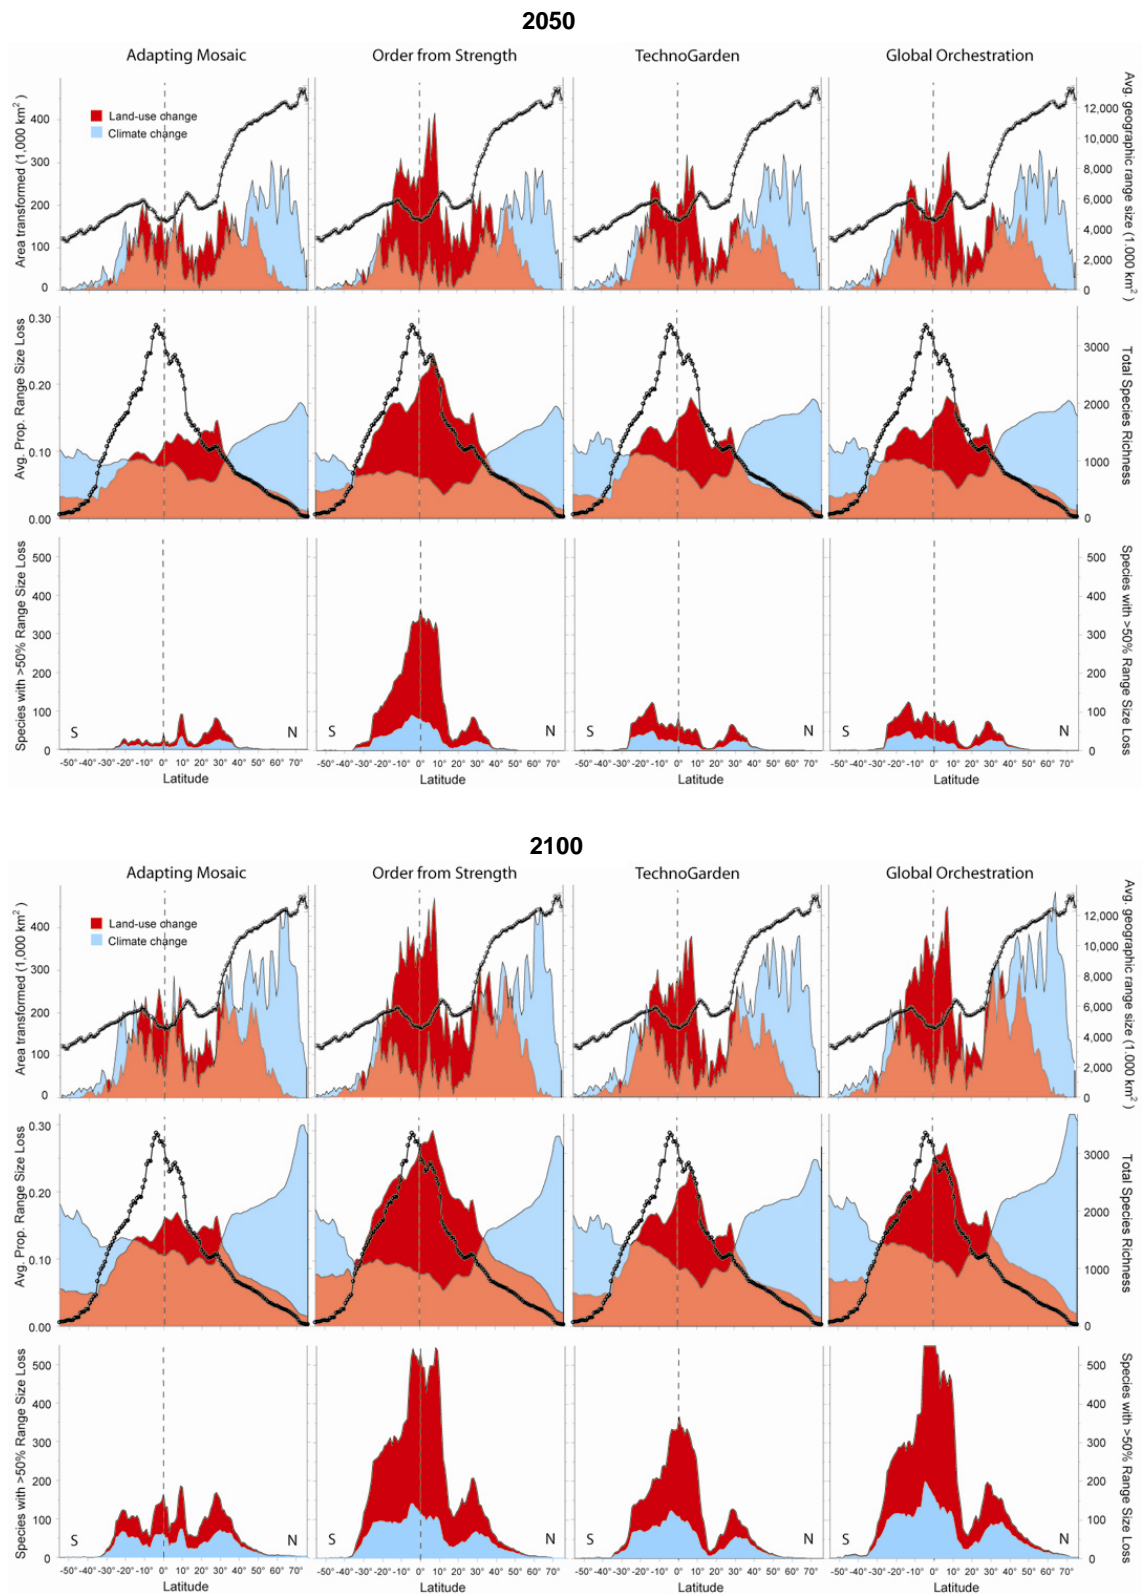

**Figure S3: Environmental change, avian biogeography, and loss in range size, by 2050 and 2100.** Projected latitudinal pattern in type of global environmental change, geographic range size, species richness and the resulting loss in geographic range size (8,750 bird species, 1° bands of latitude). Climate (cyan) and land-use (red) changes are

evaluated for all four scenarios, between now and 2050 and 2100, respectively. First row: Total area transformed and average ( $\pm$  s.e.) current geographic range size of species per latitudinal band; second row: Average proportional loss of range size and total number of bird species whose range currently overlaps at each latitudinal band. Third row: Count of species with  $\geq 50\%$  of range transformed jointly by climate change or land-use change (coloration indicates the proportion of range area that is transformed by each land change type). Note that the six left panels for 2100 are identical with Figure 3 in the printed article.
